# Supplementary material for: Controllable synthesis of hollow periodic mesoporous organosilica spheres with radial mesochannels and their degradable behavior
Source: Royal Society of Chemistry journal article supplement (doi:10.1039/c8ta02569j), 2018-01-01
Supplement: c8ta02569j1.pdf [file c8ta02569j1.pdf]

## **Supporting Information**

### **Controllable Synthesis of Hollow Periodic Mesoporous Organosilica Spheres with Radial Mesochannels and Their Degradable Behavior**

Yangyi Sun<sup>ab</sup>, Min Chen<sup>b</sup>, Limin Wu<sup>b1</sup>

*<sup>a</sup> Key Laboratory of Advanced Textile Materials and Manufacturing Technology and Engineering Research Center for Eco-Dyeing & Finishing of Textiles, Ministry of Education, Zhejiang Sci-Tech University, Hangzhou 310018, China. <sup>b</sup> Department of materials Science, Fudan University, Shanghai 200433, China*

---

<sup>1</sup> Corresponding author, email: [lmw@fudan.edu.cn](mailto:lmw@fudan.edu.cn)

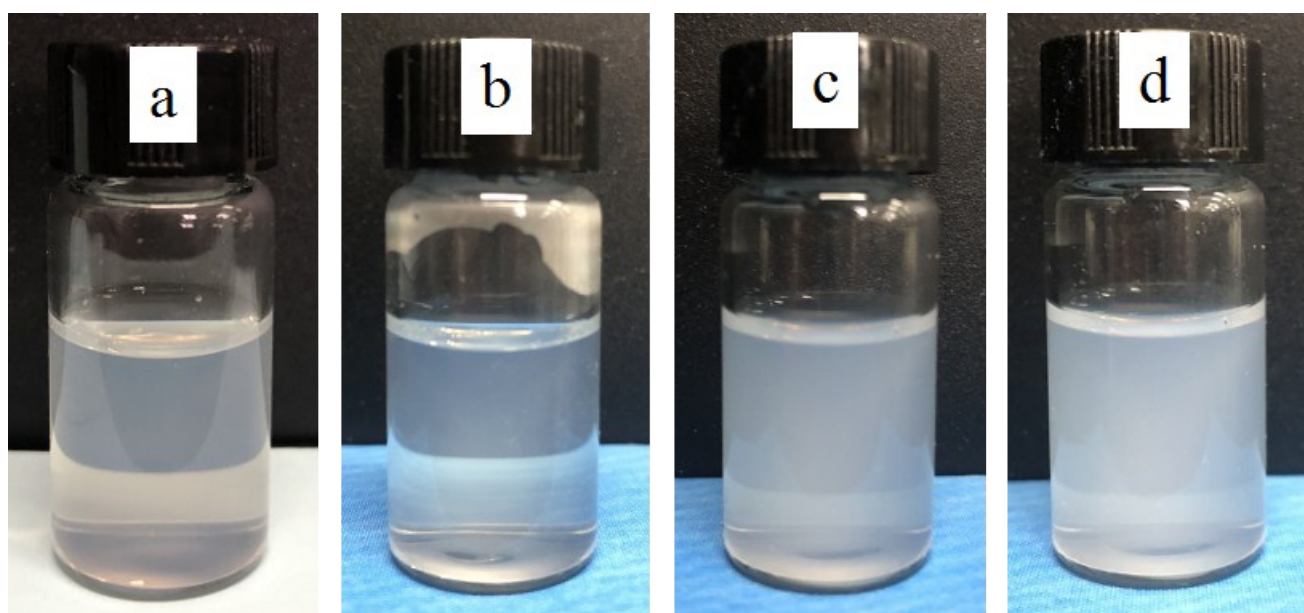

**Figure S1.** The photographs of the dispersions obtained by adding different amount of E-HMOSs in 8 mL H<sub>2</sub>O: (a) 10, (b) 25, (c) 50 and (d) 100 mg.

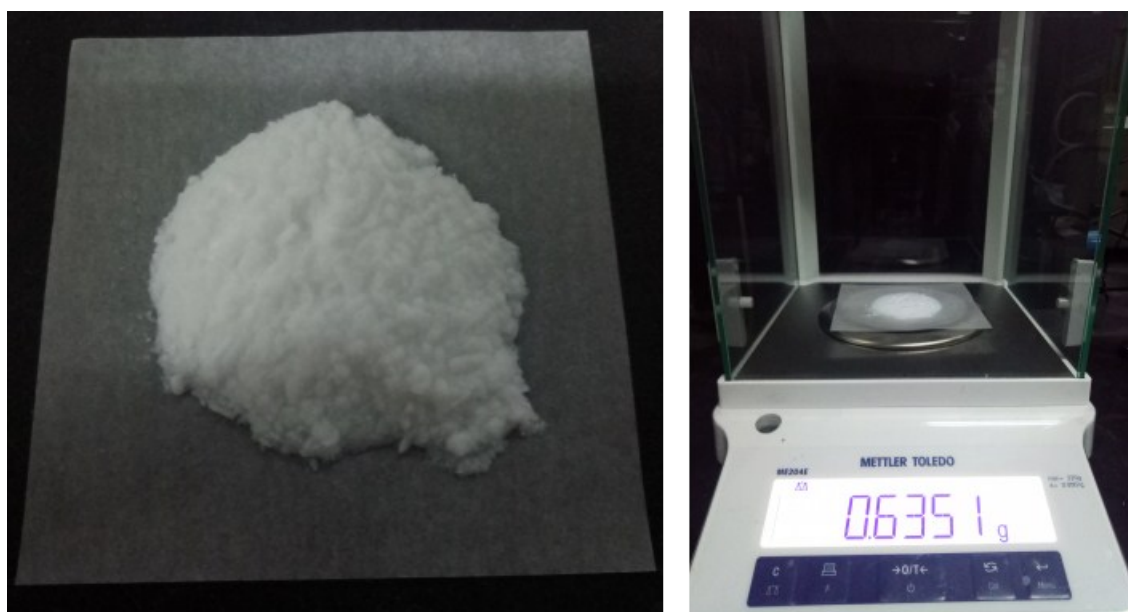

**Figure S2.** The photograph of the E-HMOSs in one-pot. Typically, the solution B was composed of 0.50 g CTAB, 8 mL ethanol, 12 mL water, and 2 mL BTEE while the reaction solution A was 200 mL deionized water, and 4 mL ammonia. The content of the added solution B to reaction solution A was 20 mL.

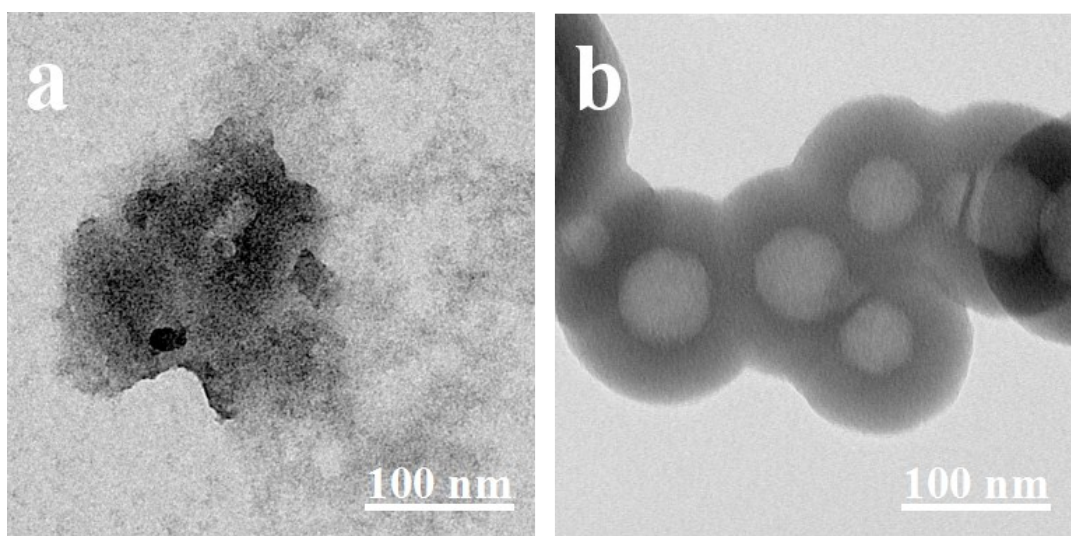

**Figure S3.** TEM images of the E-HMOSs synthesized with different amount of CTAB in precursor solution A: (a) 0, (b) 0.05 g.

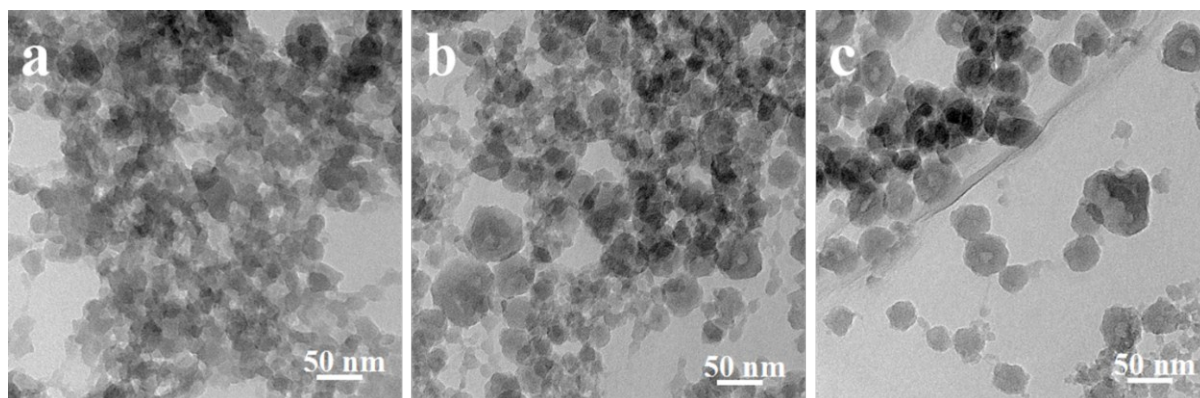

**Figure S4.** TEM images of ET-HMOSs synthesized from 0.6 mL BTEE/ 0.4 mL BTES with various pre-hydrolysis time of precursor solution B: (a) 10, (b) 20, (c) 25 min.

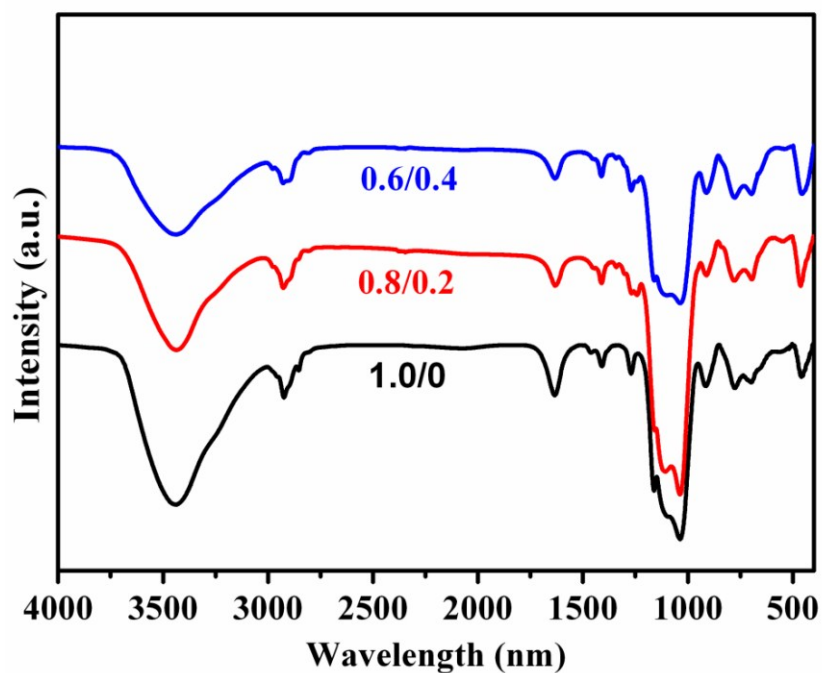

**Figure S5.** FT-IR spectra of the HMOs: 1.0 mL BTEE/ 0 mL BTES, pre-hydrolysis 20 min; 0.8 mL BTEE/ 0.2 mL BTES, pre-hydrolysis 40 min; 0.6 mL BTEE/ 0.4 mL BTES, pre-hydrolysis 50 min.

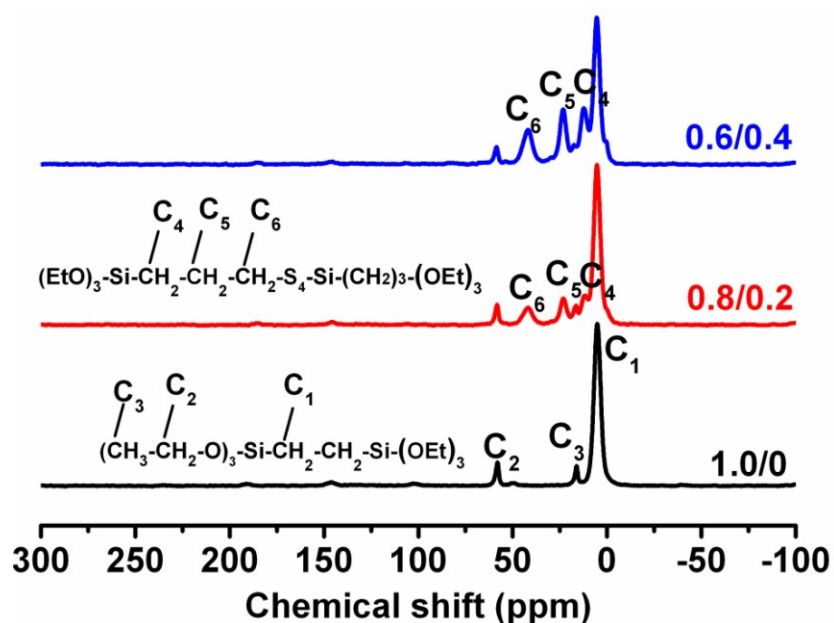

**Figure S6.** Solid-state  $^{13}\text{C}$  CPMAS NMR spectra of the HMOs synthesized by: 1.0 mL BTEE/ 0 mL BTES, pre-hydrolysis 20 min; 0.8 mL BTEE/ 0.2 mL BTES, pre-hydrolysis 40 min; 0.6 mL BTEE/ 0.4 mL BTES, pre-hydrolysis 50 min.

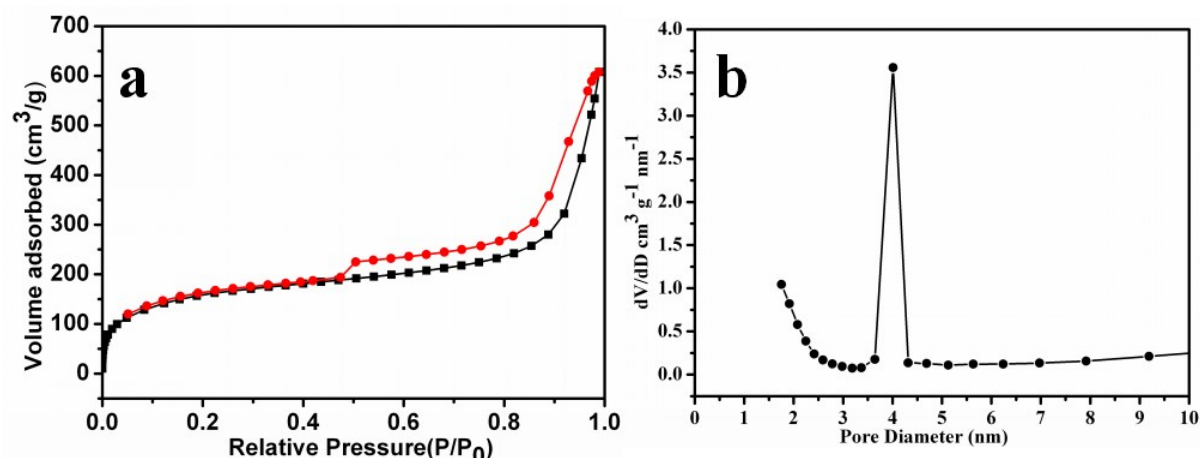

**Figure S7.** (1) Nitrogen sorption-desorption isotherm and (b) the corresponding pore size distribution of the E-HMOSs synthesized with 0.6 mL BTEE/ 0.4 mL BTES with pre-hydrolysis time of 50 min.

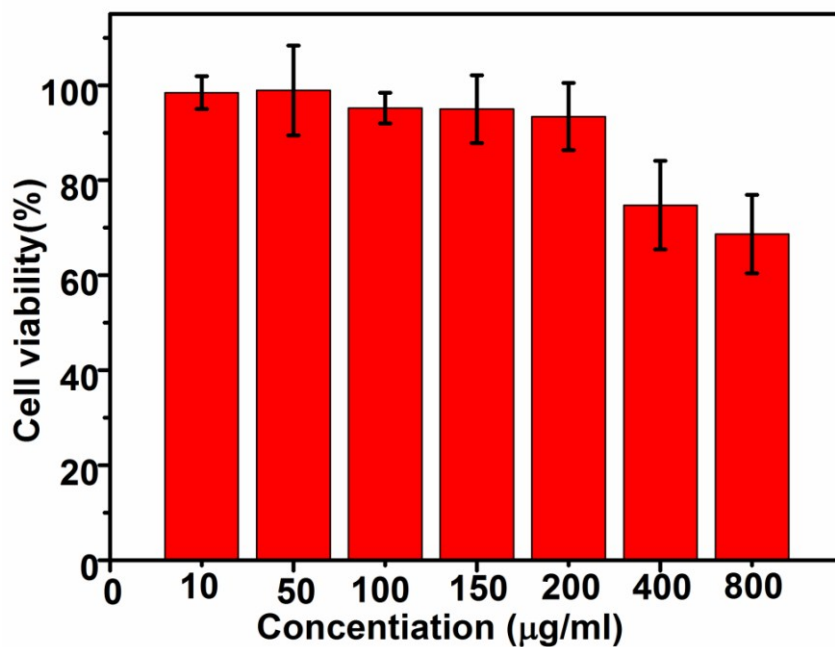

**Figure S8.** *In vitro* viability of MCF-7 cell incubated 24 h with the ET-HMOSs synthesized with 0.6 mL BTEE/ 0.4 mL BTES with pre-hydrolysis 50 min at different concentrations.

**Table S1.** Atomic compositions by EDX of the HMOSs synthesized by: 1.0 mL BTEE/ 0 mL BTES, pre-hydrolysis 20 min; 0.8 mL BTEE/ 0.2 mL BTES, pre-hydrolysis 40 min; 0.6 mL BTEE/ 0.4 mL BTES, pre-hydrolysis 50 min.

| Samples                             | Atomic percent (mol %) |       |       |      |
|-------------------------------------|------------------------|-------|-------|------|
|                                     | C                      | O     | Si    | S    |
| 1.0 mL BTEE/ 0 mL<br>BTES, 20 min   | 59.83                  | 20.06 | 11.11 | 0    |
| 0.8 mL BTEE/ 0.2<br>mL BTES, 40 min | 46.76                  | 33.0  | 17.47 | 2.77 |
| 0.6 mL BTEE/ 0.4 mL<br>BTES, 50 min | 35.88                  | 33.06 | 24.04 | 7.02 |
